# Supplementary material
Source: publisher site journal article supplement (https://www.dovepress.com/article/345241)
Supplement: Supplementary file 1 [file get_supplementary_file.php]

Supplemental Figure 1. 17-Question Survey Assessing Effectiveness of Evidence-Based Post-Operative Discharge Opioid Prescribing Guidelines

**1. On a scale of 0-10, how much pain do you have today?**

**2. How satisfied are you with the way your pain has been managed since you left the hospital?**

- Not at all mostly unsatisfied it was OK mostly satisfied very satisfied

**3. Did you receive written information about how to take your medicines for pain?**

**4. Did a staff member talk to you about how to take your medicines for pain?**

**5. Were you satisfied with the information provided to you about your medicines for pain?**

- Not at all mostly unsatisfied it was OK mostly satisfied very satisfied

**6. Are you still taking medicines to manage pain?**

- If yes:
  - **7. Which medicines are you taking and how often?**
- Name of medicine _______________:
  - More than 2 times each day 1-2 times each day
  - every second day
  - more than 2 times each week 1-2 times each week
- Name of medicine _______________:
  - More than 2 times each day 1-2 times each day
  - every second day
  - more than 2 times each week 1-2 times each week
- Name of medicine _______________:
  - More than 2 times each day 1-2 times each day
  - every second day
  - more than 2 times each week 1-2 times each week
  - **8. Are you still taking the medicines supplied when you left the hospital?**
- If yes: go to question 13
- If no
  - **9. Which doctor did you visit to get ongoing supplies of medicines for pain?**
    - GP hospital doctor other
- If no:
  - **10. Did you take all the medicines supplied from the hospital?**
    - If yes: go to question 13
    - If no:
      - **11. How many tablets do you have left?**
      - **12. What have you done with the left-over tablets?**

**13. Where did/do you store your pain killer pills?**

**14. Was the storage location locked or unlocked?**

**15. Do you think you were given the right amount of medicines for your pain when you left the hospital?**

- If yes: go to question 17
- If no
  - **16. Did you receive too few or too many?**

**17. That is all of my questions. Do you have anything else you would like me to know about your pain management or the medicines you were given when you left the hospital?**
